# Supplementary material
Source: Research Square preprint supplement (doi:10.21203/rs.3.rs-9035966/v1)
Supplement: Supplementary file 1 [file b6452229069e900208b2f01c.docx]

**High shear mechanochemical treatment enables multifunctional CNT polycarbonate nanocomposites**

Xiao Sua, Seung Ho Leea, Nikki Stanforda, Yangzhe Houa, Jiabin Daia, Qingshi Mengc, Hsu-Chiang Kuand, Jun Maa*

a School of Chemical Engineering, Adelaide University, SA5095, Australia

b College of Aerospace Engineering, Shenyang Aerospace University, Shenyang, 110136, China

c Department of Chemical and Materials Engineering, Southern Taiwan University of Science and Technology, Tainan City 710301, Taiwan

* Corresponding author: [Jun.Ma@Adelaide.edu.au](mailto:Jun.Ma@Adelaide.edu.au)

Keywords: polycarbonate, carbon nanotubes, solvent-free mechanochemistry modification, electromagnetic interference, mechanical property.


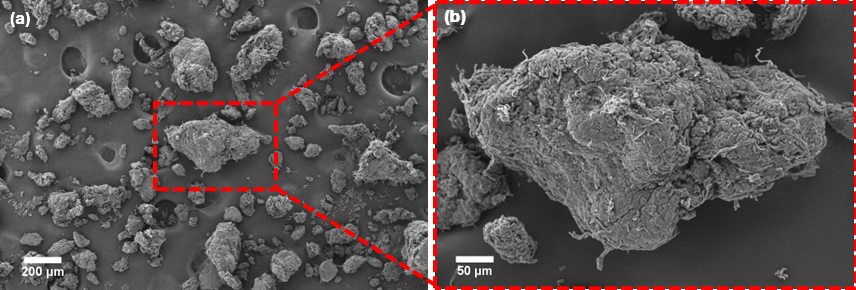


Fig. S1. SEM micrographs of PC/BMCNTs.
